# Supplementary material for: Machine Learning-Based Prediction of Survival Prognosis in Cervical Cancer
Source: Research Square preprint supplement (doi:10.21203/rs.3.rs-134659/v1), 2020-12-31
Supplement: Supplementary file 1 [file 30eb6756b64446ca62f47f3b.docx]

Supplementary Materials for

**Machine learning-based prediction of survival prognosis in cervical cancer**

Dongyan Ding1,2#, Tingyuan Lang1,2,3#* ,Dongling Zou2 ,Jiawei Tan4 ,Jia Chen4 ,Lei Zhou5,6,7 ,Dong Wang2 ,Rong Li2 ,Yunzhe Li1,2 ,Jingshu Liu1,2 ,Cui Ma8 ,Qi Zhou1,2,3*

1Key Laboratory of Biorheological Science and Technology (Chongqing University), Ministry of Education, Bioengineering College, Chongqing University, Chongqing, 400044, People's Republic of China; 2Department of Gynecologic Oncology, Chongqing University Cancer Hospital, School of Medicine, Chongqing University, Chongqing, 400030, People's Republic of China; 3Chongqing Key Laboratory of Translational Research for Cancer Metastasis and Individualized Treatment, Chongqing University Cancer Hospital, School of Medicine, Chongqing University, Chongqing, 400030, People's Republic of China; 4School of Mathematics and Statistics, Changchun University of Technology, Changchun, 130012, People's Republic of China; 5Singapore Eye Research Institute, The academia, 20 College Road, Discovery Tower Level 6, Singapore, 169856, Singapore; 6Department of Ophthalmology, Yong Loo Lin School of Medicine, National University of Singapore, Singapore; 7Ophthalmology and Visual Sciences Academic Clinical Research Program, Duke-NUS Medical School, National University of Singapore, Singapore; 8Department of Pediatric Hematology, First hospital of Jilin University, Changchun 130023, Jilin, People's Republic of China.

**# Dongyan Ding and Tingyuan Lang contributed equally to this work.**

*Correspondence: Qi Zhou, Department of Gynecologic Oncology, Chongqing University Cancer Hospital, School of Medicine, Chongqing University, Chongqing, 400030, People's Republic of China, ([cqzl_zq@163.com](mailto:cqzl_zq@163.com)) and Tingyuan Lang, Department of Gynecologic Oncology, Chongqing University Cancer Hospital, School of Medicine, Chongqing University, Chongqing, 400030, People's Republic of China, ([michaellang2009@163.com](mailto:michaellang2009@163.com)).

Supplementary Figures

Figure. S1.

**
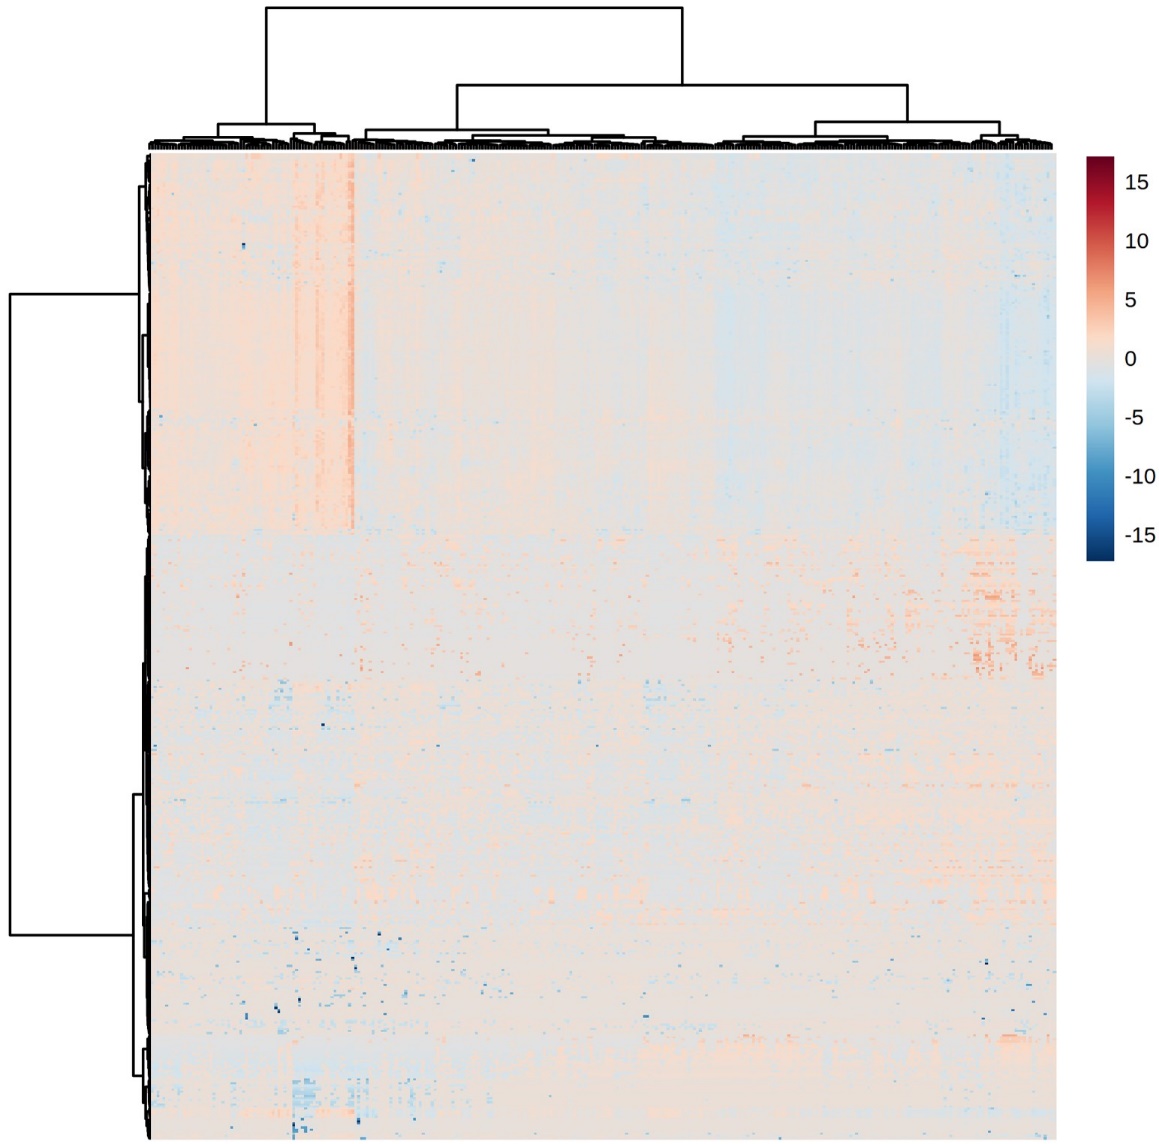
**

**Supplementary Figure 1. Expression prolife of miRNAs in cervical cancer samples.**

The TCGA data of 309 cervical and endocervical cancer samples and 3 control samples were downloaded by Firehose online tools (<http://gdac.broadinstitute.org/>), which includes the expression data of 1046 miRNAs and clinical information. Subsequently, 3 control samples, 2 metastasis samples and 707 miRNAs with missing values ≥ 20% were excluded. The rest missing values were replaced by KNN (K-Nearest Neighbor) method. The data was then normalized and scaled. The outliers were identified by IQR (Interquartile Range) method followed by KNN replacement. The preprocessed data was presented as heatmap.

**Supplementary Tables**

Supplementary Table 2. Summary of clinical information of patients.

| **Characteristics** | **Cohort (n=307)** | |
| --- | --- | --- |
| **No.** | **%** |
| **Age at initial pathologic diagnosis** | | |
| Age <= 35 | 56 | 18.24 |
| 35 < Age <= 60 | 192 | 62.54 |
| Age > 60 | 59 | 19.22 |
| NA | 0 | 0.00 |
| **Age began smoking** | | |
| Age <= 30 | 75 | 24.43 |
| Age > 30 | 10 | 3.26 |
| NA | 222 | 72.31 |
| **Neoplasm pathologic margin involved text** | | |
| Margins free of tumor | **23** | 7.49 |
| Others | 17 | 5.54 |
| NA | 267 | 86.97 |
| **Neoplasm pathologic margin involved type** | | |
| Macroscopic and microscopic parametrial involvement | 10 | 3.26 |
| Other location, specify | 40 | 13.03 |
| Positive bladder and vaginal margin | 13 | 4.23 |
| NA | 244 | 79.48 |
| **Survival (years)** | | |
| <=3 | 46 | 14.98 |
| >3 | 69 | 22.48 |
| Loss to follow up <=3 | 192 | 62.54 |
| **Height (cm)** |  |  |
| < 150 | 15 | 4.89 |
| 150 - 160 | 119 | 38.76 |
| 160 - 170 | 111 | 36.16 |
| >= 170 | 19 | 6.19 |
| NA | 43 | 14.01 |
| **Histological type** | | |
| Adenosquamous | 6 | 1.95 |
| Cervical squamous cell carcinoma | 254 | 82.74 |
| Endocervical adenocarcinoma of the usual type | 6 | 1.95 |
| Endocervical type of adenocarcinoma | 21 | 6.84 |
| Endometrioid adenocarcinoma of endocervix | 3 | 0.98 |
| Mucinous adenocarcinoma of endocervical type | 17 | 5.54 |
| NA | 0 | 0.00 |
| **Race** | | |
| American Indian or Alaska Native | 8 | 2.61 |
| Asian | 20 | 6.51 |
| Black or African American | 30 | 9.77 |
| Native Hawaiian or other Pacific Islander | 2 | 0.65 |
| White | 211 | 68.73 |
| NA | 36 | 11.73 |
| **Clinical stage** | | |
| Stage I - IIa | 189 | 61.56 |
| Stage IIb - IVb | 111 | 36.16 |
| NA | 7 | 2.28 |
| **HPV infection** | | |
| HPV16 | 172 | 56.03 |
| HPV18 | 39 | 12.70 |
| Others | 73 | 23.78 |
| NA | 23 | 7.49 |

NA: Not available, HPV: Human Paplillomavirus.
