# Supplementary material for: Machine Learning-Based Prediction of Survival Prognosis in Cervical Cancer
Source: Research Square preprint supplement (doi:10.21203/rs.3.rs-134659/v1), 2020-12-31
Supplement: Supplementary file 2 [file c6b2159ad4eb87ece0744d45.xlsx]

## Sheet: Sheet1
Supplementary Table 4. K-means clustering of cervical cancer patients.
K-means clustering algorithm was used to stratify the patients. The patients were stratified into 2 to 6 groups (The parameter K was set to 2 to 6) by all 55, top 30 and top 20 survival-related miRNAs as features.
Sample ID	Top 20 survival-related miRNAs																				Top 30 survival-related miRNAs																				All 55 survival-related miRNAs
	K=2		K=3			K=4				K=5					K=6						K=2		K=3			K=4				K=5					K=6						K=2		K=3			K=4
	Group 1	Group 2	Group 1	Group 2	Group 3	Group 1	Group 2	Group 3	Group 4	Group 1	Group 2	Group 3	Group 4	Group 5	Group 1	Group 2	Group 3	Group 4	Group 5	Group 6	Group 1	Group 2	Group 1	Group 2	Group 3	Group 1	Group 2	Group 3	Group 4	Group 1	Group 2	Group 3	Group 4	Group 5	Group 1	Group 2	Group 3	Group 4	Group 5	Group 6	Group 1	Group 2	Group 1	Group 2	Group 3	Group 1	Group 2	Group 3	Group 4
TCGA-2W-A8YY-01		●		●					●				●					●				●		●					●				●			●						●		●					●
TCGA-4J-AA1J-01		●		●			●				●					●						●		●			●				●					●						●		●			●
TCGA-BI-A0VR-01		●		●			●				●					●						●		●			●						●			●						●		●			●
TCGA-BI-A0VS-01	●				●				●			●						●			●				●			●						●					●			●			●				●
TCGA-BI-A20A-01	●				●			●				●								●	●				●			●				●								●	●				●			●
TCGA-C5-A0TN-01	●				●				●				●					●				●			●				●					●					●			●			●				●
TCGA-C5-A1BE-01		●		●					●				●					●				●		●			●						●			●						●		●			●
TCGA-C5-A1BF-01		●		●			●				●					●						●		●			●						●			●						●		●			●
TCGA-C5-A1BI-01		●		●			●				●						●					●		●			●						●			●						●		●			●
TCGA-C5-A1BJ-01		●		●					●				●					●				●		●			●						●			●						●		●			●
TCGA-C5-A1BK-01		●		●			●				●					●						●		●			●						●			●						●		●			●
TCGA-C5-A1BL-01		●		●					●				●					●				●		●					●				●			●						●		●					●
TCGA-C5-A1BM-01	●		●			●								●					●		●		●			●				●										●	●		●					●
TCGA-C5-A1BN-01		●		●					●				●					●				●		●					●					●					●			●		●			●
TCGA-C5-A1BQ-01		●			●			●				●					●				●				●			●				●					●				●				●				●
TCGA-C5-A1M5-01		●			●				●				●				●					●			●			●					●				●					●			●				●
TCGA-C5-A1M6-01		●			●				●				●					●				●			●				●					●					●			●			●				●
TCGA-C5-A1M7-01		●		●					●				●					●				●			●				●					●					●			●		●					●
TCGA-C5-A1M8-01		●			●			●				●					●					●			●			●					●				●					●			●				●
TCGA-C5-A1M9-01	●				●				●				●					●				●			●				●					●					●		●				●				●
TCGA-C5-A1ME-01		●			●				●				●				●				●				●			●						●					●			●			●				●
TCGA-C5-A1MF-01	●				●			●				●								●	●				●			●				●								●	●				●			●
TCGA-C5-A1MH-01		●		●			●				●						●					●		●			●						●				●					●		●					●
TCGA-C5-A1MI-01		●		●					●				●					●				●		●					●				●			●						●		●			●
TCGA-C5-A1MJ-01		●		●					●				●					●				●		●					●				●			●						●		●			●
TCGA-C5-A1MK-01		●			●				●				●					●				●			●				●					●					●			●			●				●
TCGA-C5-A1ML-01	●				●				●				●					●			●				●				●					●					●			●			●				●
TCGA-C5-A1MN-01		●			●				●				●					●				●			●				●					●					●			●		●					●
TCGA-C5-A1MP-01		●		●			●				●					●						●		●			●						●			●						●		●					●
TCGA-C5-A1MQ-01	●		●			●				●										●	●		●			●				●										●	●		●					●
TCGA-C5-A2LS-01		●		●			●				●					●						●		●			●						●			●						●		●			●
TCGA-C5-A2LT-01	●		●			●				●										●	●		●			●				●										●	●		●					●
TCGA-C5-A2LV-01	●				●			●				●								●		●			●				●					●					●			●			●				●
TCGA-C5-A2LX-01		●		●			●				●					●						●		●			●						●			●						●		●			●
TCGA-C5-A2LY-01		●		●			●				●					●						●		●			●				●					●						●		●			●
TCGA-C5-A2LZ-01		●		●			●				●						●					●		●			●						●				●					●			●				●
TCGA-C5-A2M1-01		●			●				●				●					●				●			●				●				●						●			●			●				●
TCGA-C5-A2M2-01		●			●				●				●					●				●			●			●				●						●				●			●				●
TCGA-C5-A3HD-01		●		●			●				●							●				●		●			●				●					●						●		●			●
TCGA-C5-A3HE-01		●		●					●				●					●				●		●					●				●			●						●		●					●
TCGA-C5-A3HF-01		●		●			●				●						●					●		●				●					●				●					●			●				●
TCGA-C5-A3HL-01		●			●			●				●					●					●			●			●				●					●					●			●				●
TCGA-C5-A7CG-01		●			●			●				●					●					●			●			●				●					●					●			●				●
TCGA-C5-A7CH-01	●				●			●				●								●	●				●				●					●					●		●				●			●
TCGA-C5-A7CJ-01		●		●			●				●					●						●		●			●						●			●						●		●					●
TCGA-C5-A7CK-01	●				●			●				●								●	●				●			●				●								●	●				●			●
TCGA-C5-A7CL-01	●		●			●				●										●	●		●			●				●										●	●		●					●
TCGA-C5-A7CM-01		●		●			●				●					●						●		●			●						●					●				●		●					●
TCGA-C5-A7CO-01		●			●			●				●					●					●			●			●				●					●					●			●				●
TCGA-C5-A7UC-01	●				●				●				●					●			●				●				●					●					●			●			●				●
TCGA-C5-A7UE-01		●		●				●				●					●					●		●			●						●				●					●		●					●
TCGA-C5-A7UH-01	●				●			●				●								●	●				●				●					●					●		●				●			●
TCGA-C5-A7UI-01		●			●				●				●					●				●			●			●						●					●			●			●				●
TCGA-C5-A7X3-01	●				●			●				●					●				●				●			●						●					●			●			●				●
TCGA-C5-A7X5-01	●				●				●				●					●			●				●				●					●					●		●		●					●
TCGA-C5-A7X8-01		●		●			●				●					●						●		●			●				●					●						●		●			●
TCGA-C5-A7XC-01		●			●			●				●					●					●			●			●				●					●				●				●				●
TCGA-C5-A8XH-01		●		●			●				●					●						●		●			●				●					●						●		●			●
TCGA-C5-A8XI-01		●			●			●				●					●					●			●			●				●					●					●			●				●
TCGA-C5-A8XJ-01		●			●			●				●					●					●			●		●						●				●					●		●					●
TCGA-C5-A8XK-01		●			●				●				●					●				●			●				●					●					●			●			●				●
TCGA-C5-A8YQ-01		●			●			●				●					●				●				●			●				●					●				●				●			●
TCGA-C5-A8YR-01	●				●				●					●					●		●				●				●					●					●			●			●				●
TCGA-C5-A8YT-01		●		●			●				●					●						●		●			●						●			●						●		●			●
TCGA-C5-A8ZZ-01		●		●			●				●					●						●		●			●						●					●				●		●					●
TCGA-C5-A901-01	●				●			●				●					●				●				●			●				●								●	●				●			●
TCGA-C5-A902-01	●				●			●						●					●		●				●			●						●					●		●				●			●
TCGA-C5-A905-01		●			●			●				●					●					●			●			●				●					●				●				●				●
TCGA-C5-A907-01		●		●			●						●			●						●		●					●					●					●			●		●					●
TCGA-DG-A2KH-01		●		●			●				●					●						●		●			●						●			●						●			●				●
TCGA-DG-A2KJ-01		●		●			●				●					●						●		●			●						●			●						●		●					●
TCGA-DG-A2KK-01		●			●			●			●						●					●		●			●						●				●					●			●				●
TCGA-DG-A2KL-01		●		●			●				●						●					●		●			●						●				●					●		●					●
TCGA-DG-A2KM-01		●		●			●				●						●					●		●			●						●				●					●			●				●
TCGA-DR-A0ZL-01		●		●			●				●					●						●		●			●						●			●						●		●			●
TCGA-DR-A0ZM-01		●		●			●				●					●						●		●			●						●			●						●		●			●
TCGA-DS-A0VK-01		●			●			●				●					●					●			●			●				●					●					●			●				●
TCGA-DS-A0VL-01		●			●			●				●					●					●			●			●					●				●					●			●				●
TCGA-DS-A0VM-01		●		●			●				●					●						●		●			●				●					●						●		●			●
TCGA-DS-A0VN-01		●		●			●				●					●						●		●			●				●					●						●		●			●
TCGA-DS-A1O9-01		●		●					●				●					●				●		●			●				●					●						●		●			●
TCGA-DS-A1OA-01	●		●					●				●								●	●		●			●				●										●	●		●					●
TCGA-DS-A1OB-01	●				●				●				●					●			●				●				●					●					●		●				●			●
TCGA-DS-A1OC-01	●		●						●				●							●	●		●			●				●										●	●		●					●
TCGA-DS-A1OD-01	●		●			●				●										●	●		●			●				●										●	●		●					●
TCGA-DS-A3LQ-01		●			●			●				●					●					●			●			●						●					●			●			●				●
TCGA-DS-A5RQ-01		●			●			●				●					●					●			●			●				●					●					●			●				●
TCGA-DS-A7WF-01	●		●			●				●					●						●		●			●				●					●						●		●			●
TCGA-DS-A7WH-01		●		●			●				●					●						●		●			●				●					●						●		●			●
TCGA-DS-A7WI-01	●		●			●				●					●						●		●			●				●					●						●		●			●
TCGA-EA-A1QS-01	●		●			●				●										●	●		●			●				●										●	●		●					●
TCGA-EA-A1QT-01		●		●					●				●					●				●		●			●						●			●						●		●			●
TCGA-EA-A3HQ-01		●		●			●				●					●						●		●			●						●			●						●		●			●
TCGA-EA-A3HR-01		●			●			●				●					●					●			●			●				●					●					●			●				●
TCGA-EA-A3HS-01		●		●			●				●					●						●		●			●						●				●					●			●				●
TCGA-EA-A3HT-01		●			●			●				●					●					●			●			●					●				●					●			●				●
TCGA-EA-A3HU-01		●		●			●				●					●						●		●			●						●			●						●		●			●
TCGA-EA-A3QD-01		●		●			●				●					●						●		●			●						●			●						●		●			●
TCGA-EA-A3QE-01		●		●			●				●					●						●		●			●						●			●						●		●					●
TCGA-EA-A3Y4-01	●		●			●						●								●	●		●			●				●										●	●		●					●
TCGA-EA-A410-01		●		●					●				●					●				●		●					●		●							●				●		●					●
TCGA-EA-A411-01		●			●			●				●					●					●			●			●					●				●					●			●				●
TCGA-EA-A439-01		●			●				●				●					●				●			●				●			●					●					●			●				●
TCGA-EA-A43B-01		●		●					●				●					●				●		●			●				●					●						●		●			●
TCGA-EA-A44S-01		●		●			●				●					●						●		●			●				●					●						●		●			●
TCGA-EA-A4BA-01		●		●			●				●					●						●		●			●				●							●				●		●			●
TCGA-EA-A50E-01		●		●			●				●					●						●		●			●						●			●						●		●					●
TCGA-EA-A556-01		●		●					●				●					●				●		●					●		●							●				●		●			●
TCGA-EA-A5FO-01		●		●			●				●					●						●		●			●						●					●				●			●				●
TCGA-EA-A5O9-01	●		●			●				●					●						●		●			●				●					●						●		●			●
TCGA-EA-A5ZD-01		●		●			●				●					●						●		●			●						●			●						●		●			●
TCGA-EA-A5ZE-01	●				●			●				●								●	●				●			●				●								●	●				●			●
TCGA-EA-A5ZF-01		●		●					●				●					●				●		●					●				●					●				●		●					●
TCGA-EA-A6QX-01		●			●			●				●					●					●			●			●					●				●					●			●				●
TCGA-EA-A78R-01		●		●			●				●					●						●		●			●				●					●						●		●			●
TCGA-EA-A97N-01		●		●			●				●						●					●		●			●						●				●					●			●				●
TCGA-EK-A2GZ-01		●		●					●				●					●				●		●			●						●					●				●		●					●
TCGA-EK-A2H0-01	●				●			●				●								●	●				●			●						●					●		●				●			●
TCGA-EK-A2H1-01		●		●					●				●					●				●		●			●						●			●						●		●			●
TCGA-EK-A2IP-01	●				●				●				●					●				●			●				●					●				●				●			●				●
TCGA-EK-A2IR-01		●		●			●				●					●						●		●			●				●					●						●		●			●
TCGA-EK-A2PG-01		●		●			●				●					●						●			●			●					●				●					●			●				●
TCGA-EK-A2PI-01		●		●			●				●					●						●		●			●				●					●						●		●			●
TCGA-EK-A2PK-01		●			●			●				●					●				●				●			●				●					●					●			●				●
TCGA-EK-A2PL-01		●			●				●				●					●			●				●			●				●							●			●			●				●
TCGA-EK-A2PM-01		●		●			●				●					●						●		●			●				●					●						●		●			●
TCGA-EK-A2R7-01		●		●			●				●					●						●		●			●				●					●						●		●			●
TCGA-EK-A2R8-01		●		●			●				●					●						●		●			●				●					●						●		●			●
TCGA-EK-A2R9-01		●		●			●				●					●						●		●			●				●					●						●		●			●
TCGA-EK-A2RA-01		●		●			●				●					●						●		●			●						●			●						●		●					●
TCGA-EK-A2RB-01		●		●			●				●					●						●		●			●						●			●						●		●					●
TCGA-EK-A2RC-01		●		●			●				●					●						●		●			●						●			●						●		●			●
TCGA-EK-A2RD-01		●		●			●				●					●						●		●			●						●			●						●		●			●
TCGA-EK-A2RE-01		●			●				●				●					●				●			●				●					●					●			●			●				●
TCGA-EK-A2RJ-01		●			●				●				●					●				●			●				●					●					●			●			●				●
TCGA-EK-A2RK-01		●		●			●				●					●						●		●			●						●			●						●		●			●
TCGA-EK-A2RL-01		●		●			●				●					●						●		●			●				●					●						●		●			●
TCGA-EK-A2RM-01		●		●			●				●					●						●		●			●						●			●						●		●			●
TCGA-EK-A2RN-01	●		●			●				●										●	●		●			●				●					●						●		●			●
TCGA-EK-A2RO-01		●		●			●				●					●						●		●			●				●					●						●		●			●
TCGA-EK-A3GJ-01		●			●				●				●					●				●			●				●					●					●			●			●				●
TCGA-EK-A3GK-01		●			●			●						●			●				●				●			●				●					●				●		●					●
TCGA-EK-A3GM-01		●		●			●				●					●						●		●			●						●			●						●		●			●
TCGA-EK-A3GN-01		●		●					●				●					●				●		●			●				●					●						●		●			●
TCGA-EX-A1H5-01	●		●			●				●										●	●		●			●				●										●	●				●			●
TCGA-EX-A1H6-01		●			●			●				●					●				●				●			●				●					●				●				●			●
TCGA-EX-A3L1-01		●		●			●				●					●						●		●			●				●					●						●		●			●
TCGA-EX-A449-01		●			●			●				●					●				●				●			●				●					●				●				●				●
TCGA-EX-A69L-01		●			●			●				●					●					●			●			●					●				●					●			●				●
TCGA-EX-A69M-01	●		●			●				●					●						●		●			●				●					●						●		●			●
TCGA-EX-A8YF-01		●			●		●				●						●					●			●			●				●					●					●			●				●
TCGA-FU-A23K-01		●			●				●				●					●				●			●				●				●				●					●		●					●
TCGA-FU-A23L-01		●		●					●				●					●				●		●			●						●				●					●		●			●
TCGA-FU-A2QG-01		●		●			●				●						●					●			●			●					●				●					●			●				●
TCGA-FU-A3EO-01		●			●			●				●					●					●			●			●				●					●					●			●				●
TCGA-FU-A3HY-01		●		●			●				●					●						●		●			●						●			●						●		●					●
TCGA-FU-A3HZ-01		●		●			●				●					●						●		●			●				●					●						●		●			●
TCGA-FU-A3NI-01		●		●			●				●					●						●		●			●						●				●					●		●					●
TCGA-FU-A3TQ-01		●			●			●				●					●					●			●			●				●					●					●			●				●
TCGA-FU-A3TX-01		●		●			●				●					●						●		●			●				●					●						●		●			●
TCGA-FU-A3WB-01		●		●			●				●					●						●		●			●						●				●					●			●				●
TCGA-FU-A3YQ-01		●		●			●				●					●						●		●			●						●			●						●		●			●
TCGA-FU-A40J-01		●			●			●				●					●					●			●			●				●					●				●				●			●
TCGA-FU-A57G-01		●		●			●				●					●						●		●			●				●							●				●		●			●
TCGA-FU-A5XV-01	●		●					●				●								●	●		●			●				●										●	●		●					●
TCGA-FU-A770-01		●			●			●				●					●					●			●			●						●					●			●			●				●
TCGA-GH-A9DA-01	●		●			●				●										●	●		●			●				●										●	●		●					●
TCGA-HG-A2PA-01		●			●			●				●					●					●			●			●				●					●					●			●				●
TCGA-HG-A9SC-01		●			●			●				●					●					●			●			●				●					●					●			●				●
TCGA-HM-A3JJ-01		●		●			●				●					●						●		●			●						●			●						●		●					●
TCGA-HM-A3JK-01		●			●			●				●					●				●				●			●				●					●				●				●				●
TCGA-HM-A4S6-01		●		●			●				●					●						●		●			●						●			●						●		●					●
TCGA-HM-A6W2-01		●		●			●				●					●						●		●			●				●					●						●		●			●
TCGA-IR-A3L7-01		●		●			●				●					●						●		●			●				●					●						●		●			●
TCGA-IR-A3LA-01		●		●			●				●					●						●		●			●						●			●						●		●			●
TCGA-IR-A3LB-01	●		●			●						●								●	●		●			●				●										●	●		●					●
TCGA-IR-A3LC-01		●		●			●				●					●						●		●			●						●			●						●		●			●
TCGA-IR-A3LF-01		●		●			●				●					●						●		●			●						●				●					●		●					●
TCGA-IR-A3LH-01	●				●			●				●					●					●			●			●				●					●					●			●				●
TCGA-IR-A3LI-01		●		●			●				●					●						●		●			●				●					●						●		●			●
TCGA-IR-A3LK-01		●		●			●				●					●						●		●			●						●			●						●		●			●
TCGA-IR-A3LL-01		●			●			●				●					●					●			●			●					●				●					●			●				●
TCGA-JW-A5VG-01	●		●			●				●										●	●		●			●				●										●	●		●					●
TCGA-JW-A5VH-01		●		●					●				●					●				●		●					●		●							●				●		●			●
TCGA-JW-A5VI-01	●		●			●						●								●	●		●			●				●										●	●		●					●
TCGA-JW-A5VJ-01		●			●			●				●					●				●				●			●						●					●		●				●			●
TCGA-JW-A5VK-01		●			●				●					●					●			●			●				●					●				●				●			●				●
TCGA-JW-A5VL-01	●		●			●								●					●		●		●			●				●					●						●		●			●
TCGA-JW-A69B-01	●				●			●				●								●	●				●			●				●								●	●				●			●
TCGA-JW-A852-01		●		●			●				●					●						●		●			●						●			●						●		●			●
TCGA-JW-AAVH-01		●			●			●						●					●			●			●			●				●					●					●			●				●
TCGA-JX-A3PZ-01		●			●				●				●					●				●			●				●					●					●			●			●				●
TCGA-JX-A3Q0-01		●		●					●				●					●				●			●				●					●					●			●			●				●
TCGA-JX-A3Q8-01		●		●			●				●					●						●		●			●				●					●						●		●			●
TCGA-JX-A5QV-01	●		●					●				●								●	●		●			●				●										●	●		●					●
TCGA-LP-A4AU-01		●		●			●				●					●						●		●			●						●			●						●		●					●
TCGA-LP-A4AV-01		●			●			●				●					●				●				●			●						●					●		●				●				●
TCGA-LP-A4AW-01		●		●			●				●					●						●		●			●						●			●						●		●					●
TCGA-LP-A4AX-01		●		●					●				●					●				●		●			●						●			●						●		●			●
TCGA-LP-A5U2-01		●			●				●					●					●			●			●				●					●					●			●			●				●
TCGA-LP-A5U3-01	●		●			●								●					●		●		●			●				●										●	●		●					●
TCGA-LP-A7HU-01	●		●			●						●								●	●		●			●						●								●	●		●					●
TCGA-MA-AA3W-01		●		●			●				●						●					●			●			●					●				●					●			●				●
TCGA-MA-AA3X-01	●				●			●				●								●	●				●			●						●						●	●				●			●
TCGA-MA-AA3Y-01		●		●					●				●					●				●		●					●				●			●						●		●					●
TCGA-MA-AA3Z-01		●			●			●				●					●					●			●			●				●					●					●			●				●
TCGA-MA-AA41-01		●			●		●				●						●					●			●			●					●				●					●			●				●
TCGA-MA-AA42-01	●		●			●						●								●	●		●			●				●										●	●		●					●
TCGA-MA-AA43-01	●				●			●					●					●				●			●				●			●						●			●				●				●
TCGA-MU-A51Y-01		●		●			●				●					●						●		●			●						●			●						●		●					●
TCGA-MU-A5YI-01	●				●			●				●					●				●				●			●				●					●				●				●			●
TCGA-MU-A8JM-01		●			●				●				●					●				●			●				●					●					●			●			●				●
TCGA-MY-A5BD-01		●		●			●				●					●						●		●					●					●				●				●		●					●
TCGA-MY-A5BE-01		●		●			●				●					●						●		●			●						●			●						●		●			●
TCGA-MY-A5BF-01		●		●			●				●						●					●		●			●						●			●						●			●				●
TCGA-MY-A913-01	●				●				●					●					●			●			●				●					●					●			●			●				●
TCGA-PN-A8MA-01		●		●			●				●					●						●		●			●				●							●				●		●			●
TCGA-Q1-A5R1-01		●		●			●				●					●						●		●			●						●			●						●		●			●
TCGA-Q1-A5R2-01		●		●					●				●					●				●		●					●				●						●			●			●				●
TCGA-Q1-A5R3-01		●			●				●				●					●				●			●				●					●					●			●			●				●
TCGA-Q1-A6DT-01		●		●					●				●					●				●		●					●		●					●						●		●			●
TCGA-Q1-A6DV-01		●			●			●				●					●					●			●			●				●					●					●			●				●
TCGA-Q1-A6DW-01	●				●			●				●								●	●				●			●				●								●	●				●			●
TCGA-Q1-A73O-01		●			●			●				●					●					●			●			●				●					●				●				●				●
TCGA-Q1-A73P-01		●		●			●				●						●					●			●			●					●				●					●			●				●
TCGA-Q1-A73Q-01		●			●			●				●					●				●				●			●				●					●				●				●				●
TCGA-Q1-A73R-01	●				●			●				●								●	●		●			●						●								●	●		●					●
TCGA-Q1-A73S-01		●		●			●				●					●						●		●			●				●					●						●		●			●
TCGA-R2-A69V-01		●		●			●				●						●					●		●			●						●			●						●			●				●
TCGA-RA-A741-01	●				●			●				●								●	●				●			●				●								●	●				●			●
TCGA-UC-A7PD-01		●		●			●				●					●						●		●			●						●			●						●		●			●
TCGA-UC-A7PF-01		●		●			●				●						●					●		●			●						●				●					●			●				●
TCGA-UC-A7PG-01		●			●			●				●					●					●			●			●				●					●				●				●			●
TCGA-UC-A7PI-01		●			●			●				●					●				●				●			●				●					●				●				●			●
TCGA-VS-A8EB-01	●		●			●				●					●						●		●			●				●					●						●		●			●
TCGA-VS-A8EC-01		●		●			●				●					●						●		●			●				●							●				●		●			●
TCGA-VS-A8EG-01	●				●			●				●					●				●				●			●				●					●				●				●			●
TCGA-VS-A8EH-01		●			●				●				●					●			●				●				●					●					●		●				●				●
TCGA-VS-A8EI-01		●			●			●				●					●					●			●			●						●			●					●			●				●
TCGA-VS-A8EJ-01	●				●			●				●					●				●				●			●						●					●			●			●				●
TCGA-VS-A8EK-01		●			●				●				●					●			●				●				●					●					●		●				●			●
TCGA-VS-A8EL-01		●			●			●				●					●					●			●			●						●					●			●			●				●
TCGA-VS-A8Q8-01	●		●					●				●								●	●		●			●				●										●	●		●					●
TCGA-VS-A8Q9-01		●		●			●				●					●						●		●			●						●			●						●		●					●
TCGA-VS-A8QA-01	●				●				●					●					●			●			●				●					●					●			●			●				●
TCGA-VS-A8QC-01		●			●			●				●					●					●			●			●						●					●			●			●				●
TCGA-VS-A8QF-01		●			●			●				●					●				●				●			●						●					●		●				●				●
TCGA-VS-A8QH-01		●		●					●				●					●				●		●					●		●					●						●		●					●
TCGA-VS-A8QM-01		●		●			●				●						●					●		●			●						●				●					●			●				●
TCGA-VS-A94W-01		●		●			●				●					●						●		●			●						●			●						●		●			●
TCGA-VS-A94X-01		●			●				●				●					●				●			●				●					●					●			●			●				●
TCGA-VS-A94Y-01		●		●					●				●					●				●		●					●					●					●			●		●					●
TCGA-VS-A94Z-01		●			●			●				●					●					●		●			●						●				●					●			●				●
TCGA-VS-A950-01		●			●			●				●					●					●			●			●						●			●					●			●				●
TCGA-VS-A952-01	●				●			●				●								●	●				●			●				●								●	●				●			●
TCGA-VS-A953-01	●		●			●				●					●						●		●			●				●					●						●		●			●
TCGA-VS-A954-01		●			●			●				●					●					●			●			●				●					●				●				●				●
TCGA-VS-A957-01	●		●			●								●					●		●		●			●				●										●	●		●					●
TCGA-VS-A958-01		●			●			●				●					●					●			●			●						●			●				●				●			●
TCGA-VS-A959-01	●				●			●				●					●				●				●			●				●					●				●				●			●
TCGA-VS-A9U5-01		●		●			●				●					●						●		●			●				●					●						●		●			●
TCGA-VS-A9U6-01		●			●			●				●					●					●			●			●				●					●					●			●				●
TCGA-VS-A9U7-01	●				●			●				●					●				●				●			●				●								●	●		●					●
TCGA-VS-A9UA-01	●				●			●				●					●				●				●			●				●								●	●				●			●
TCGA-VS-A9UB-01	●				●			●						●					●		●				●			●						●					●		●				●				●
TCGA-VS-A9UC-01	●				●			●				●					●				●				●			●				●								●	●		●					●
TCGA-VS-A9UD-01		●			●				●				●					●				●			●				●				●					●				●			●				●
TCGA-VS-A9UH-01		●			●				●				●					●			●				●			●						●					●		●				●			●
TCGA-VS-A9UI-01	●		●					●				●								●	●		●			●				●										●	●		●					●
TCGA-VS-A9UJ-01		●			●			●				●					●					●			●			●				●						●				●			●				●
TCGA-VS-A9UL-01	●		●			●								●					●		●		●			●				●										●	●		●			●
TCGA-VS-A9UM-01	●				●			●				●					●				●				●			●				●								●	●		●					●
TCGA-VS-A9UO-01	●		●			●						●								●	●		●			●				●										●	●		●			●
TCGA-VS-A9UP-01		●		●			●				●					●						●		●			●				●					●						●		●			●
TCGA-VS-A9UQ-01		●		●			●				●					●						●		●			●						●			●						●		●			●
TCGA-VS-A9UR-01	●				●			●				●								●	●				●			●				●								●	●		●					●
TCGA-VS-A9UT-01		●		●			●				●					●						●		●			●				●					●						●		●			●
TCGA-VS-A9UU-01		●		●			●				●					●						●		●			●						●			●						●			●				●
TCGA-VS-A9UV-01	●				●				●					●					●			●			●				●					●				●			●				●				●
TCGA-VS-A9UY-01	●		●			●				●					●						●		●			●				●					●						●		●			●
TCGA-VS-A9UZ-01		●			●			●				●					●				●				●			●				●					●				●				●			●
TCGA-VS-A9V0-01		●		●			●				●					●						●		●			●						●					●				●		●					●
TCGA-VS-A9V1-01		●			●			●				●					●					●			●			●				●					●					●			●				●
TCGA-VS-A9V2-01	●				●			●				●					●				●				●			●				●					●				●				●			●
TCGA-VS-A9V3-01	●		●			●				●					●						●		●			●				●					●						●		●			●
TCGA-VS-A9V4-01		●		●			●				●					●						●		●			●						●					●				●		●					●
TCGA-VS-A9V5-01		●			●			●				●					●					●			●			●				●					●				●				●				●
TCGA-VS-AA62-01	●		●			●				●					●						●		●			●				●					●						●		●			●
TCGA-WL-A834-01		●		●			●				●					●						●		●			●						●			●						●		●					●
TCGA-XS-A8TJ-01		●		●			●				●					●						●		●			●				●					●						●		●			●
TCGA-ZJ-A8QO-01		●		●			●				●					●						●		●			●						●			●						●		●					●
TCGA-ZJ-A8QQ-01	●				●			●				●								●	●				●			●						●					●		●		●					●
TCGA-ZJ-A8QR-01	●		●			●								●					●		●		●			●				●										●	●		●					●
TCGA-ZJ-AAX4-01	●		●			●				●										●	●		●			●				●					●						●		●			●
TCGA-ZJ-AAX8-01	●		●			●						●								●	●		●			●				●										●	●		●					●
TCGA-ZJ-AAXA-01		●			●			●				●					●					●			●			●				●					●					●			●				●
TCGA-ZJ-AAXB-01		●		●			●				●					●						●		●			●						●			●						●		●					●
TCGA-ZJ-AAXD-01	●				●			●				●					●				●				●			●				●					●				●				●			●
TCGA-ZJ-AAXF-01		●			●			●				●					●				●				●			●				●					●				●				●			●
TCGA-ZJ-AAXI-01	●		●			●				●										●	●		●			●				●										●	●		●			●
TCGA-ZJ-AAXJ-01	●		●			●								●					●		●		●			●				●										●	●		●					●
TCGA-ZJ-AAXN-01	●		●			●				●					●						●		●			●				●					●						●		●			●
TCGA-ZJ-AAXT-01		●			●				●				●					●				●			●				●					●					●		●				●				●
TCGA-ZJ-AAXU-01		●			●			●				●					●					●			●			●				●					●				●				●				●
TCGA-ZJ-AB0H-01		●		●			●				●					●						●		●			●						●				●					●			●				●
TCGA-ZJ-AB0I-01	●		●			●				●										●	●		●			●				●										●	●		●					●
TCGA-ZX-AA5X-01		●		●			●				●						●					●		●			●						●				●					●			●				●
[truncated: 11 more columns]
